# Supplementary material for: Interaction of Piriformospora indica with Azotobacter chroococcum
Source: PubMed Central journal article supplement (PMC4563567; doi:10.1038/srep13911), 2015-09-09
Supplement: srep13911-s1.pdf [file srep13911-s1.pdf]

## Interaction of *Piriformospora indica* with *Azotobacter chroococcum*

Soubhagya Kumar Bhuyan<sup>1</sup>, Prasun Bandyopadhyay<sup>2</sup>, Pramod Kumar<sup>1</sup>, Deepak Kumar Mishra<sup>1</sup>, Ramraj Prasad<sup>1</sup>, Abha Kumari<sup>1</sup>, Kailash Chandra Upadhyaya<sup>3</sup>, Ajit Varma<sup>2</sup> & Pramod Kumar Yadava<sup>1\*</sup>

### Supplimentary data

**Figure S1.** Visualization of the *A. chroococcum* – *P. indica* interaction in Hill and Kaeyer agar plates in the presence and absence of *A. chroococcum* strains. (A) control plate. (B) interaction of *P. indica* with WR3. (C) interaction of *P. indica* with WR9. (D) interaction of *P. indica* with AS4.

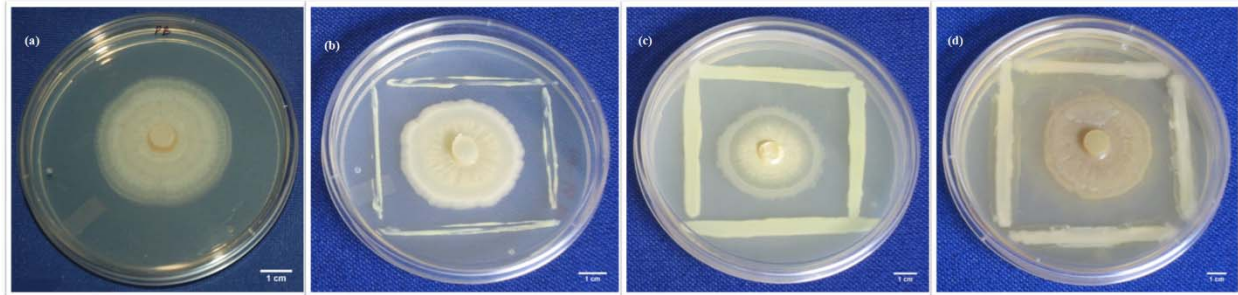

**Figure S 2.** Influence of *A. chroococcum* strains on the (A) dry cell weight and (B) spore yield of *P. indica* in Hill and Kaeyer liquid medium. Statistical analysis was performed using GraphPad Prism software by one way analysis of variance (ANOVA), followed by Dunnett's multiple comparison test. Values represented as mean  $\pm$ sd, n=3. \*\* $P \leq 0.01$ , \*\*\*\* $P \leq 0.01$  compared with *P. indica* alone. Error bar represents standard deviation (SD).

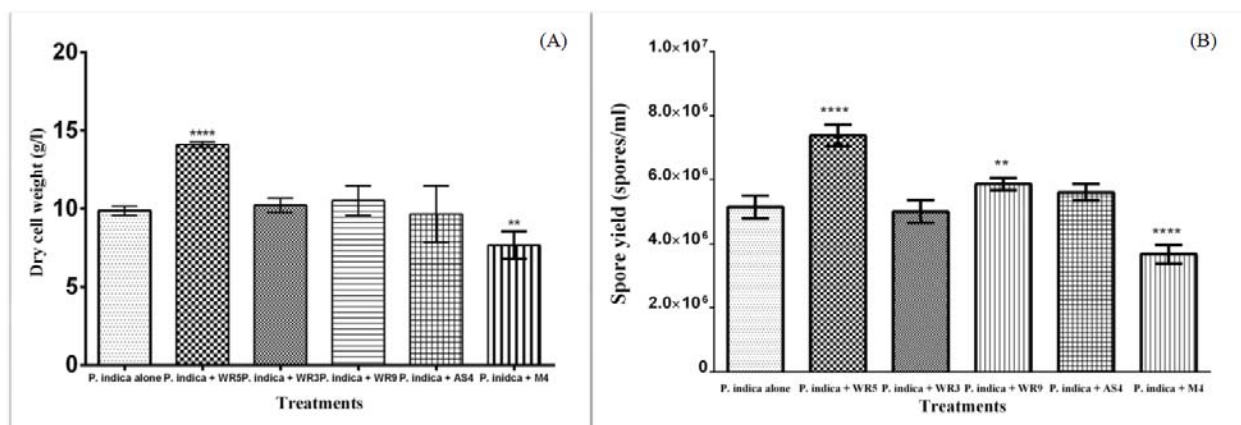

**Figure S3.** A list of protein spots identifier number, that exhibit change in expression fold level was analyzed pairwise between control and WR5-treated *P. indica* using Progenesis SameSpots analysis software.

Identifier 457

Position (740, 1256)

Notes

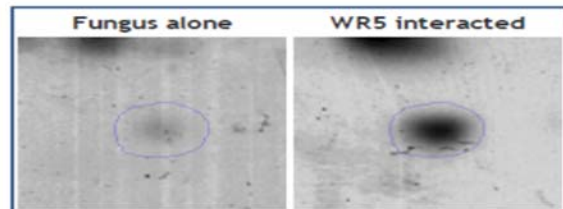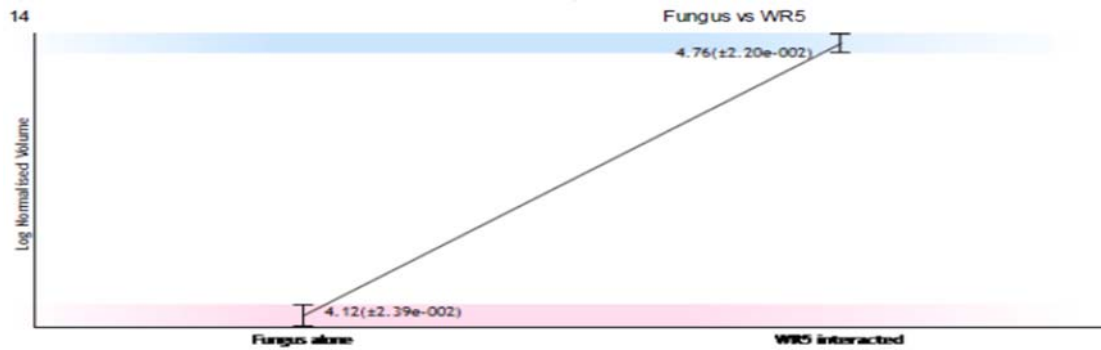

Identifier 444

Position (709, 1178)

Notes

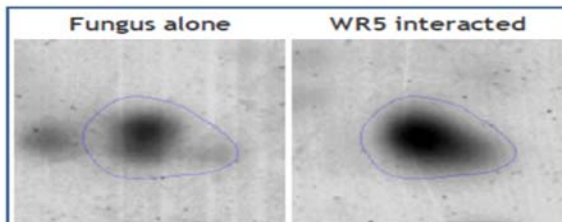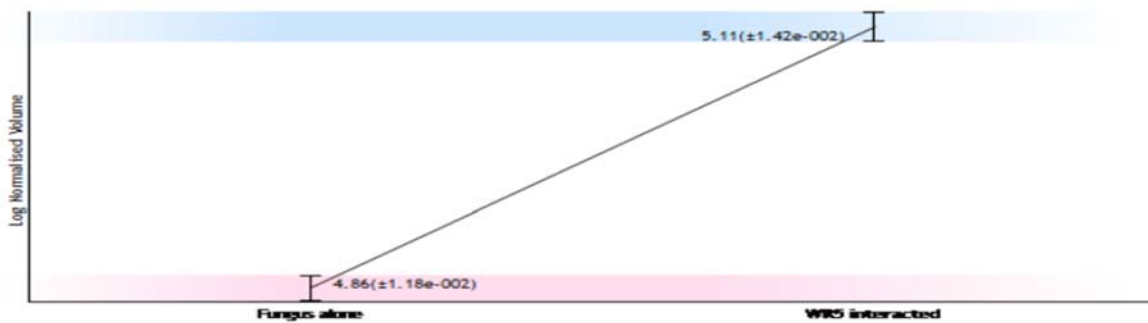

Identifier 443

Position (395, 1177)

Notes

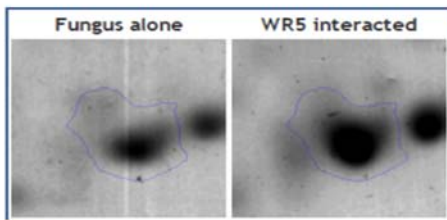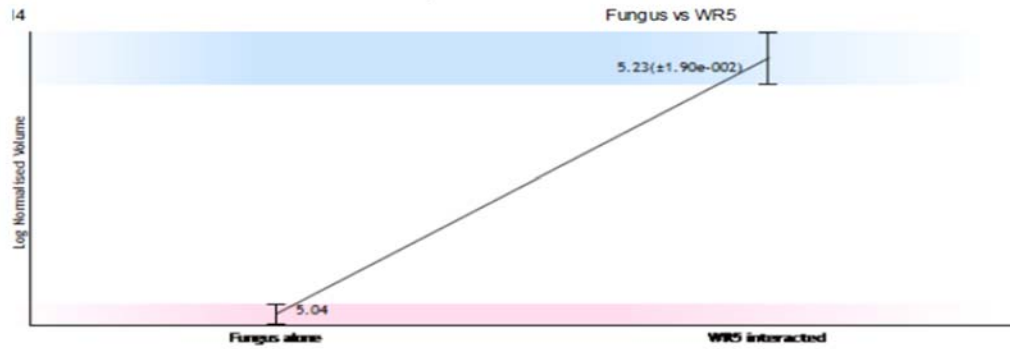

Identifier 440

Position (439, 1160)

Notes

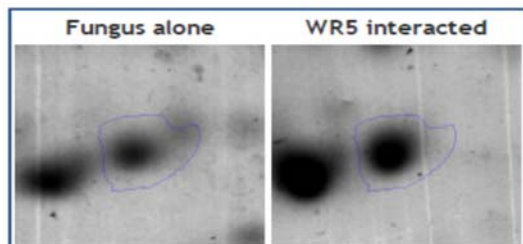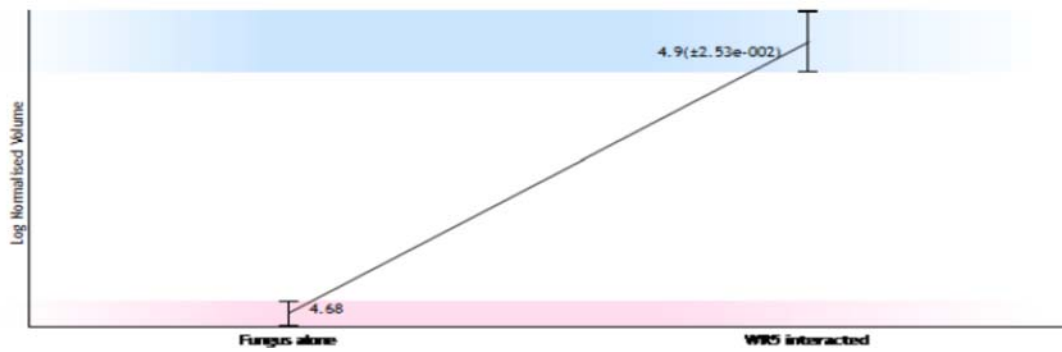

Identifier 406

Position (287, 999)

Notes

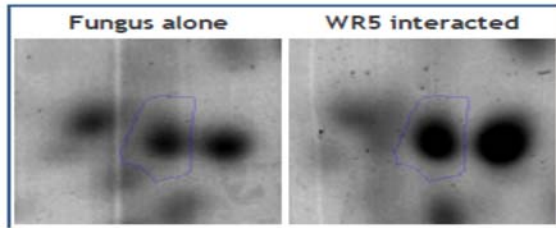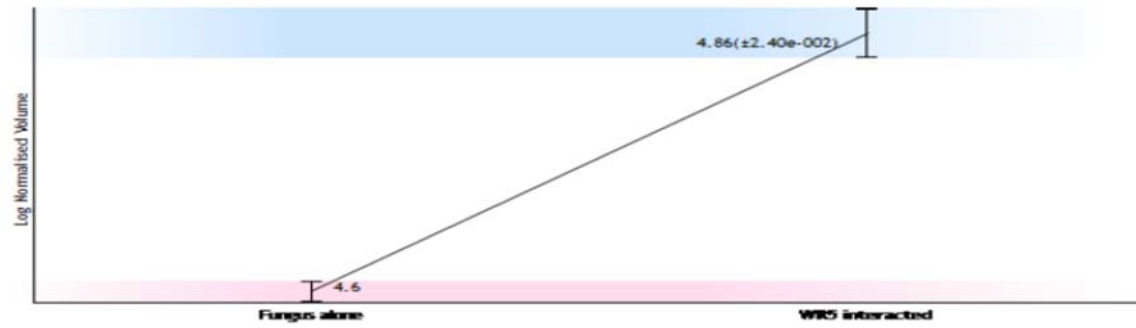

Identifier 416

Position (927, 1037)

Notes

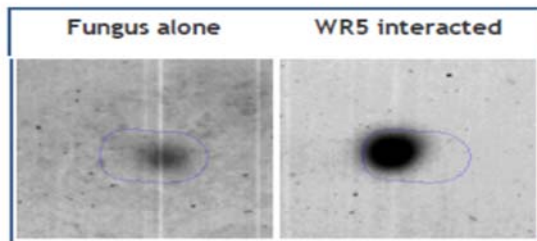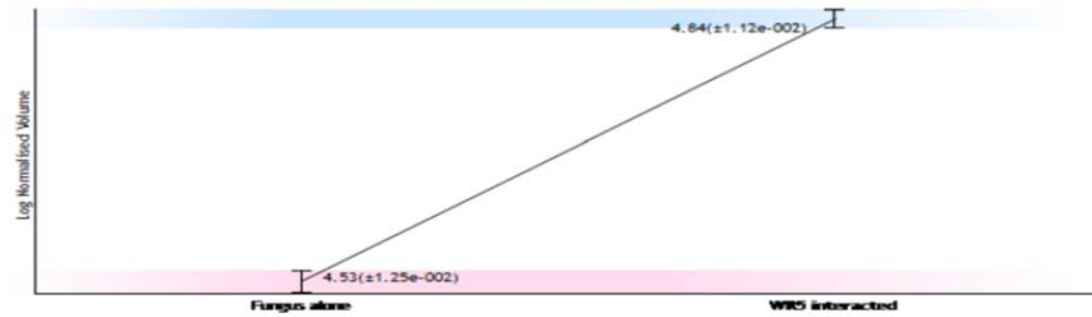

# Identifier 332

Position (368, 710)

Notes

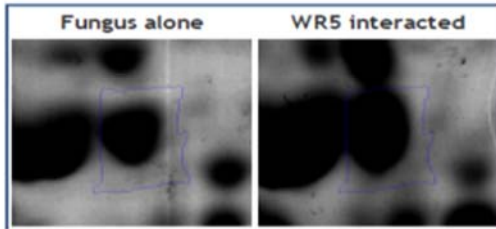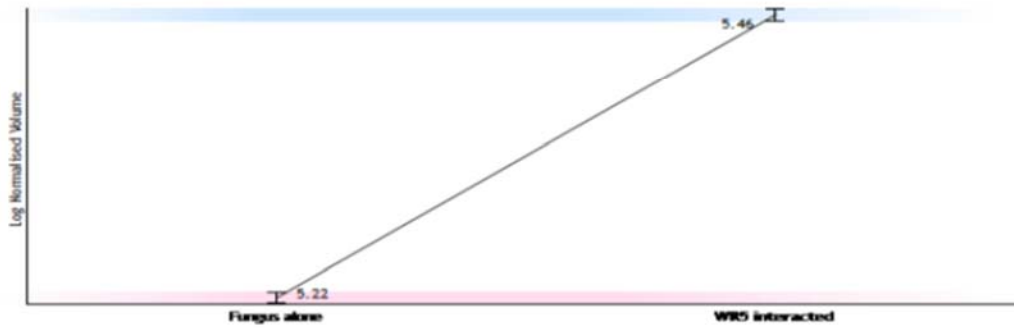

# Identifier 320

Position (363, 651)

Notes

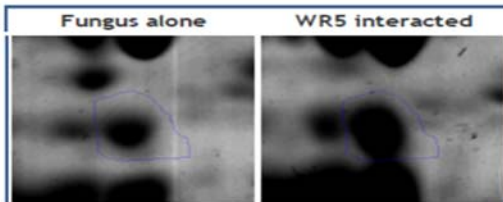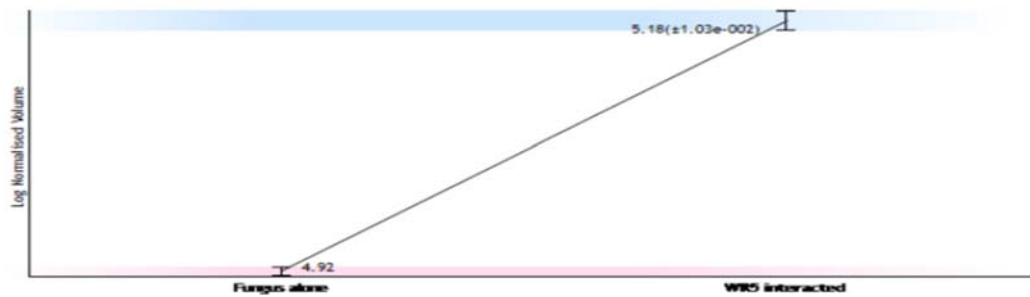

Identifier 342

Position (319, 724)

Notes

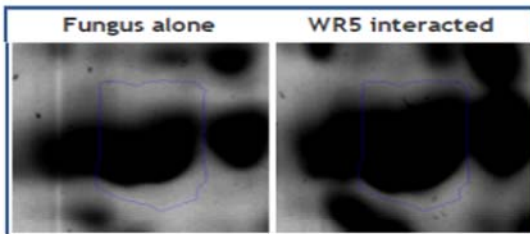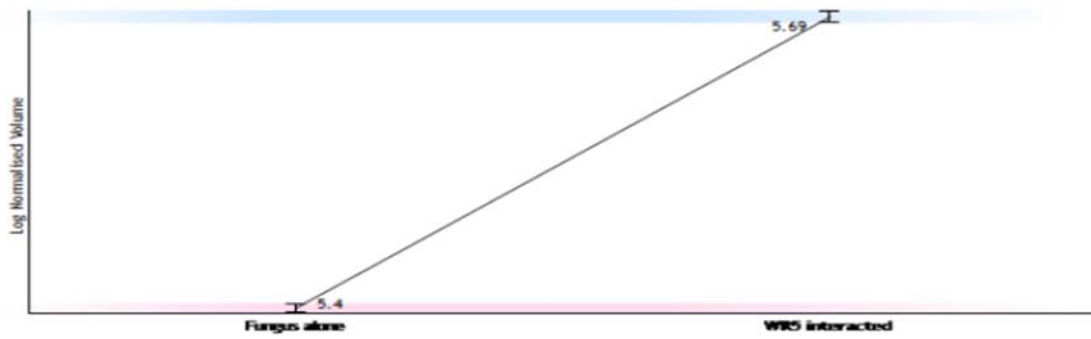

Identifier 287

Position (373, 583)

Notes

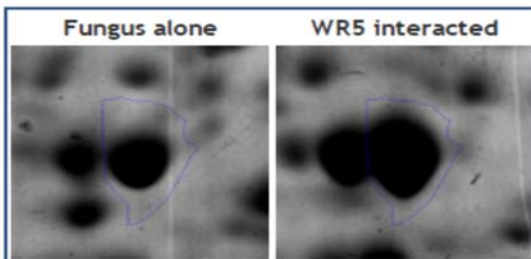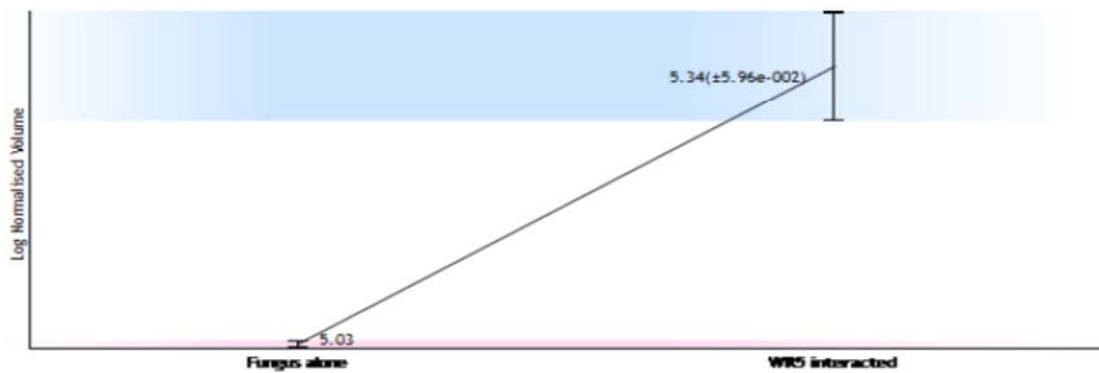

Identifier 428

Position (613, 1084)

Notes

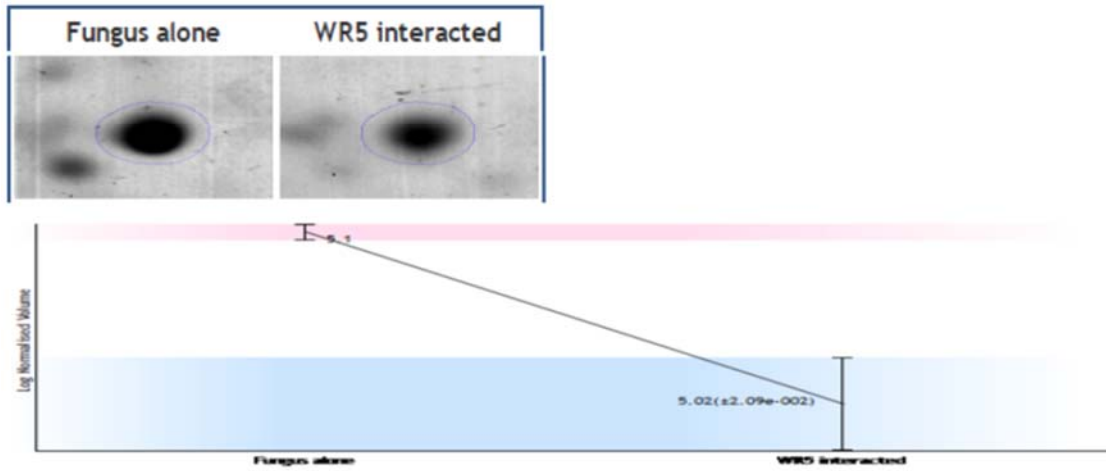

Identifier 330

Position (965, 701)

Notes

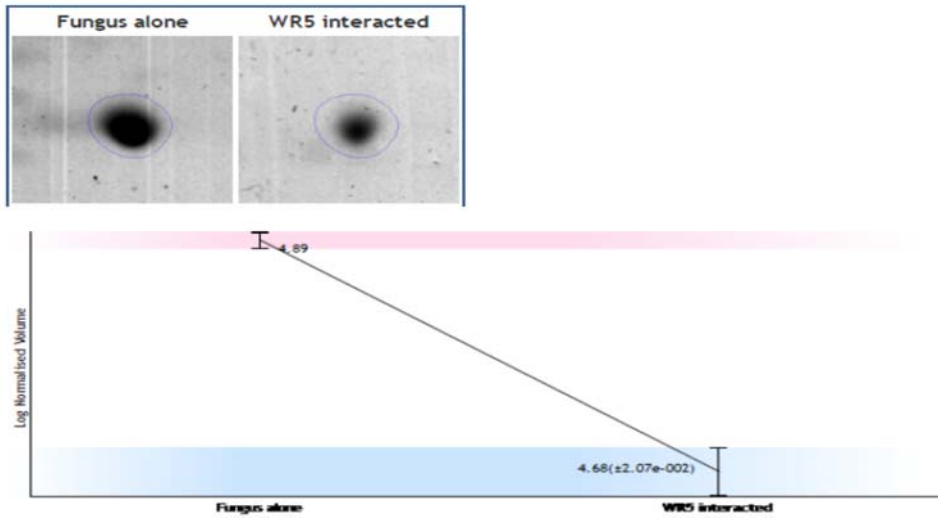

Identifier 305

Position (858, 623)

Notes

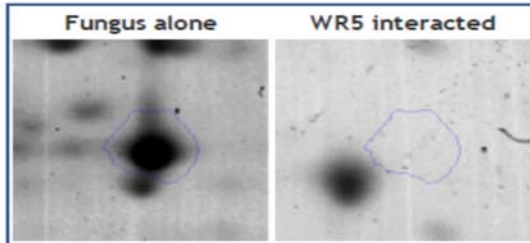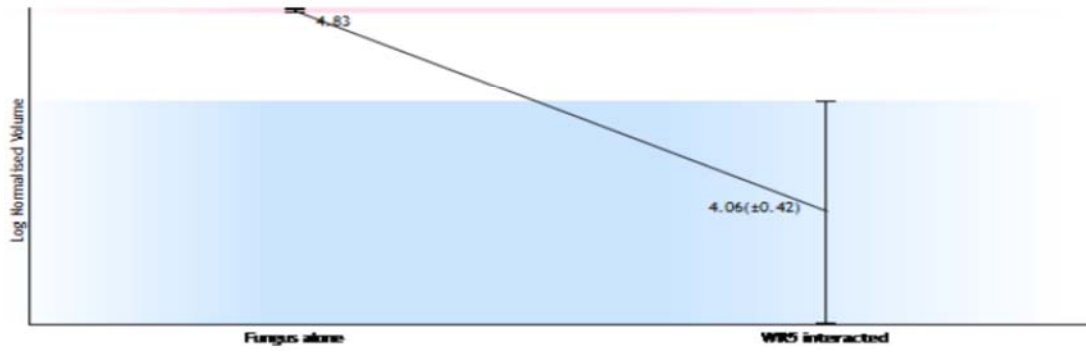

Identifier 296

Position (481, 606)

Notes

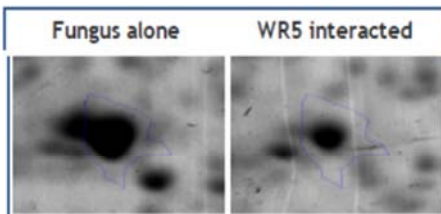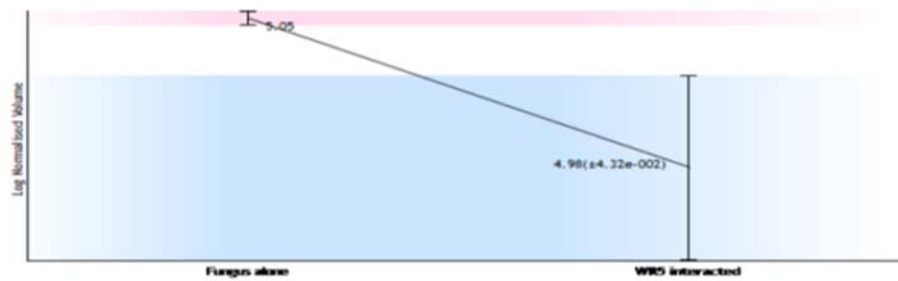



# Identifier 207

Position (442, 427)

Notes

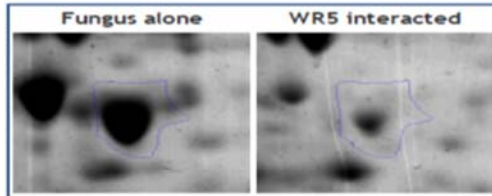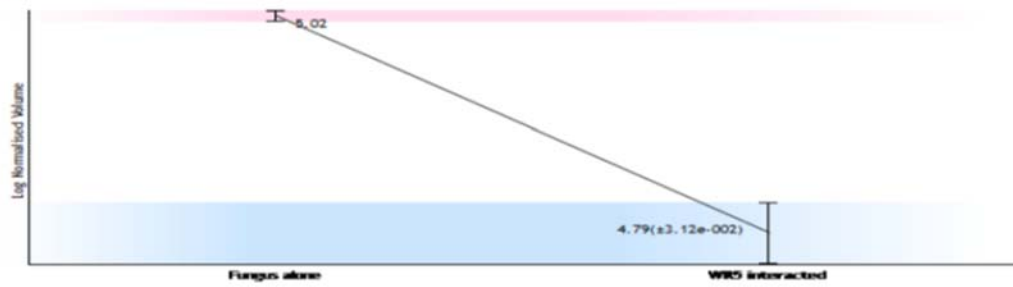

# Identifier 198

Position (398, 406)

Notes

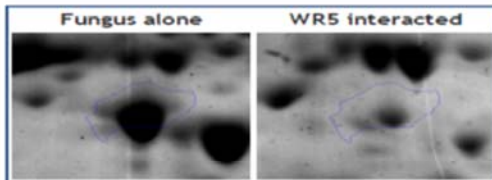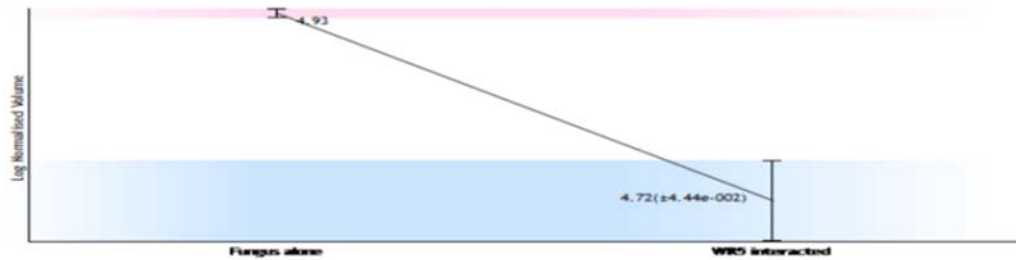

**Figure S4.** A list of protein spots identifier number, that exhibit a drastic change in expression fold level in M4-treated fungus analyzed pairwise between control and M4-treated *P. indica* using Progenesis SameSpots analysis software.

Identifier 334

Position (344, 700)  
Notes

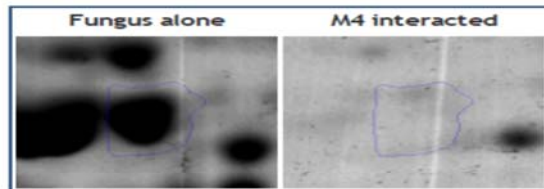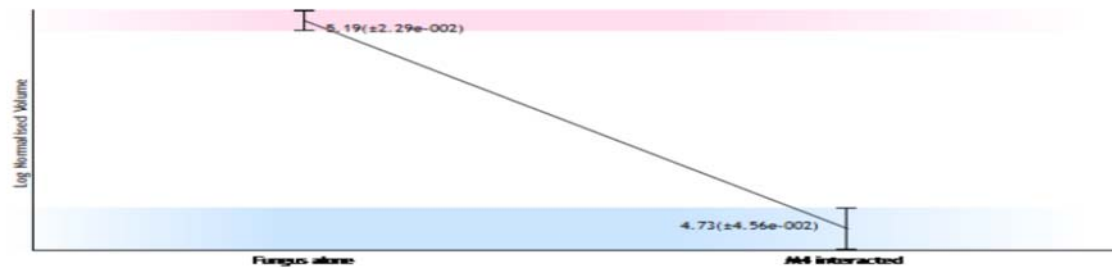

Identifier 320

Position (339, 642)  
Notes

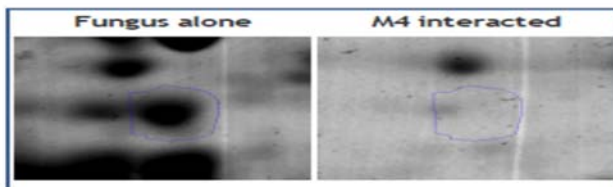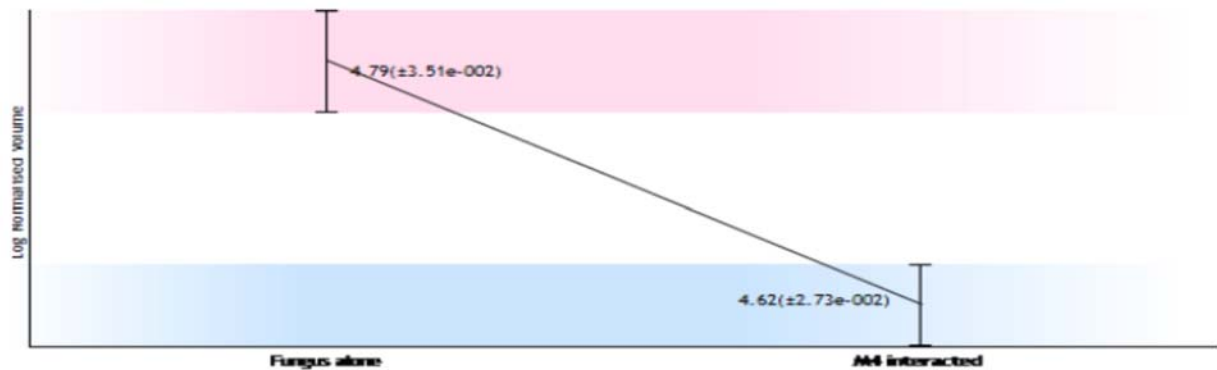

Identifier 341

Position (295, 716)

Notes

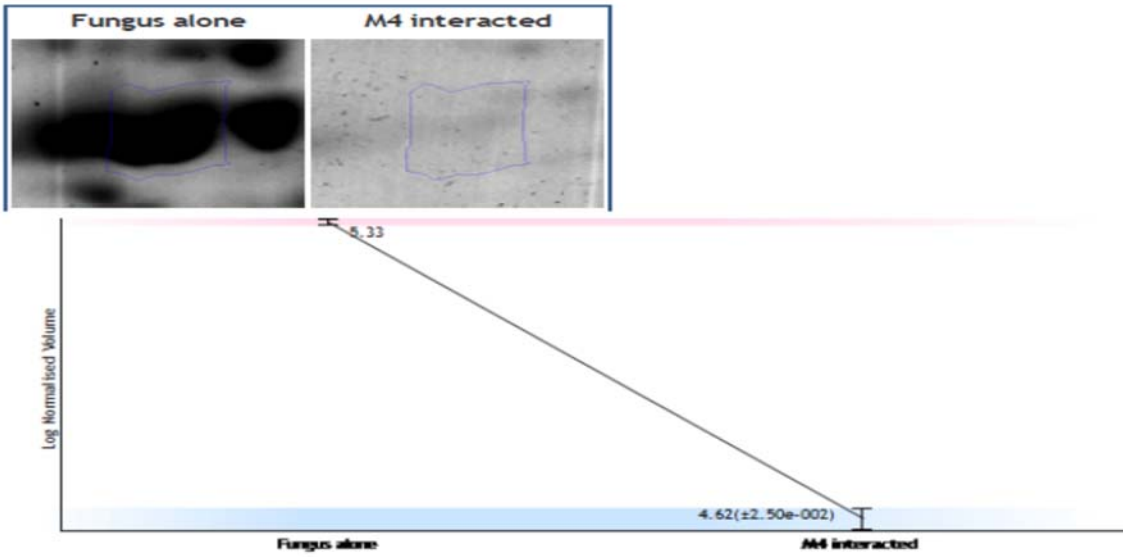

Identifier 292

Position (349, 574)

Notes

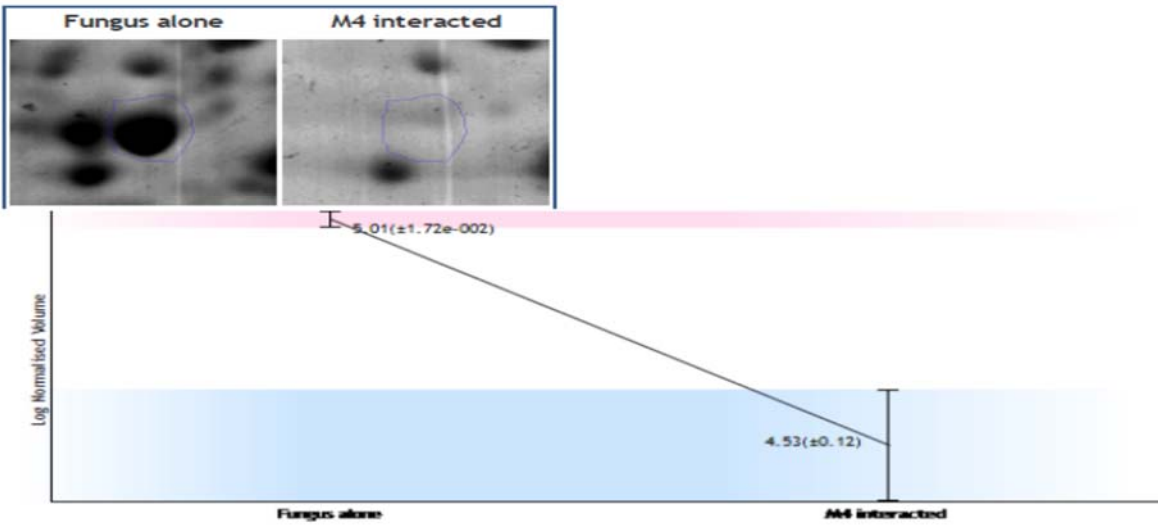

Identifier 452

Position (690, 1166)

Notes

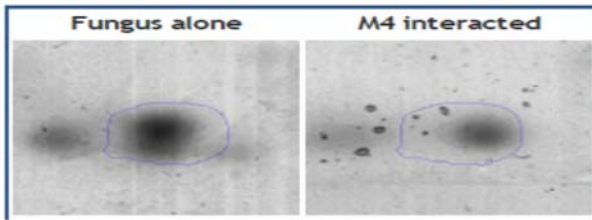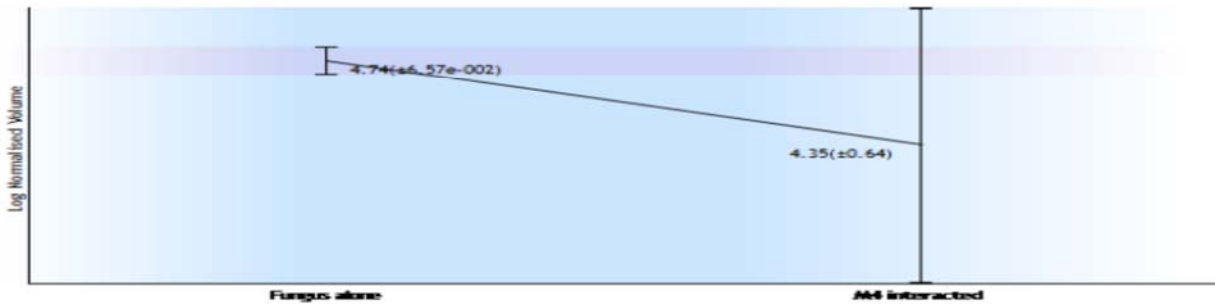

Identifier 422

Position (588, 1076)

Notes

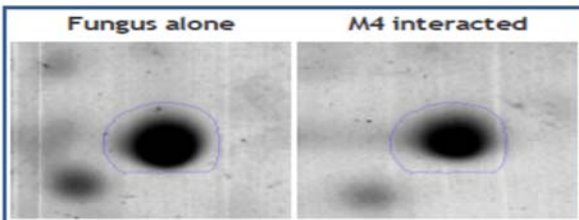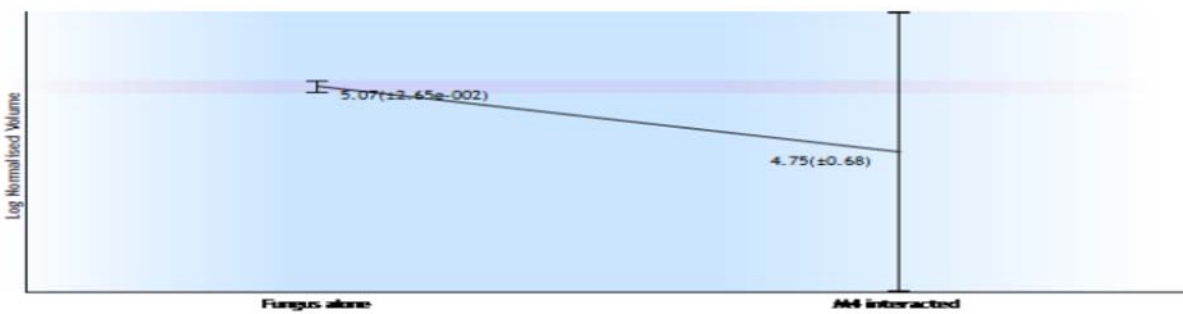

Identifier 309

Position (833, 614)

Notes

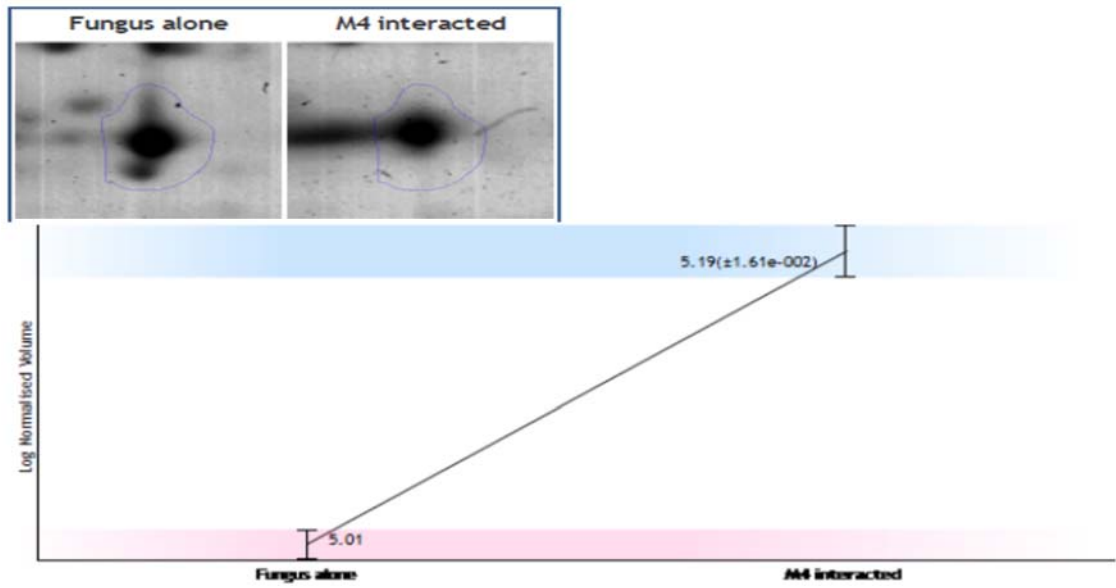

Identifier 301

Position (-435, 602)

Notes

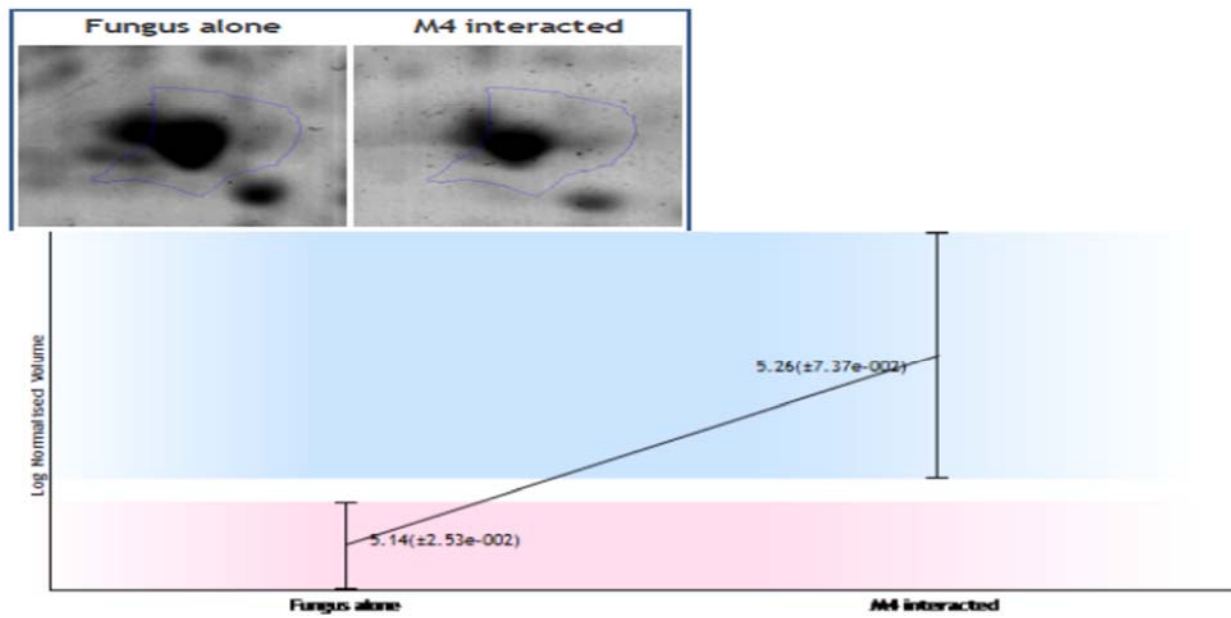

Identifier 210

Position (418, 420)

Notes

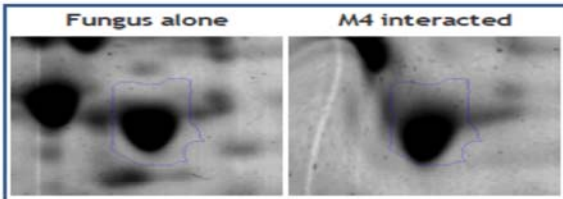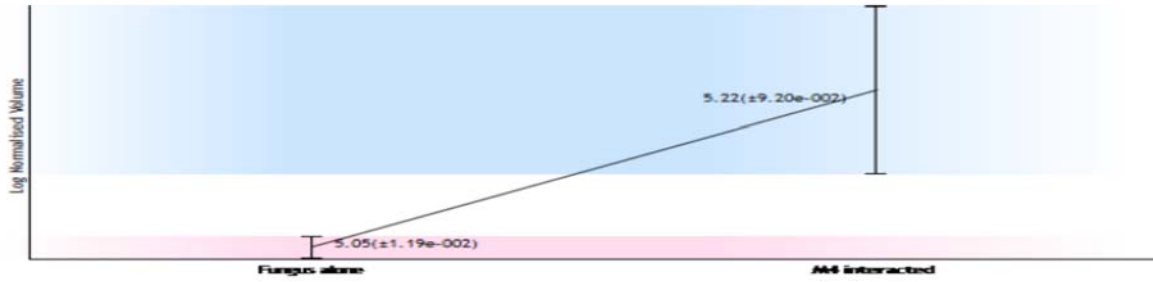

Identifier 198

Position (371, 402)

Notes

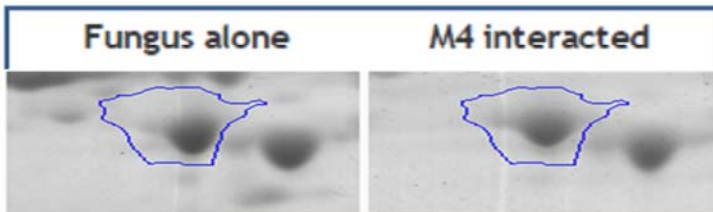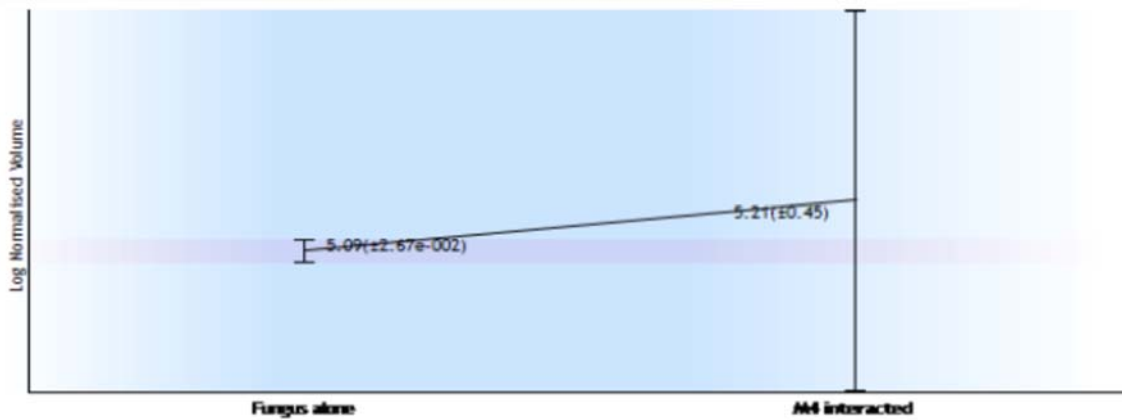

**Figure S5.** The matched peptide list of total sixteen protein spots identified through MALDI-TOF/MS of all three groups.

Spot number 3Wu

hypothetical protein PIIN\_09126 [*Piriformospora indica* DSM 11827]

| 10         | 20         | 30         | 40         | 50         | 60         | 70         | 80         |
|------------|------------|------------|------------|------------|------------|------------|------------|
| MAAYLNRVVG | SDFGGCSMNQ | PYAMANRVNF | DRGFVCGRRK | DVEETKSYRQ | LDPHPHLLIR | YIRDTAGTLR | INNPQTRRTI |
| 90         | 100        | 110        |            |            |            |            |            |
| ATLARSTSKG | ARSTHPPAFH | PH         |            |            |            |            |            |

Spot number 4Wu/4M

hypothetical protein PIIN\_04261 [*Piriformospora indica* DSM 11827]

| 10         | 20         | 30         | 40         | 50         | 60         | 70         | 80         |
|------------|------------|------------|------------|------------|------------|------------|------------|
| MARCVNSCYQ | SSLHITGFI  | SLVLIQGAPI | DRAFRRVKV  | DLHPLLQFKG | GKAGIAIHTY | RHTQSGFPPI | NALLNLARFY |
| 90         | 100        | 110        | 120        | 130        | 140        | 150        | 160        |
| AQTVAVLLAS | SAAAVPMIDI | HGLDYSVGT  | ATFFLLTGGH | TLPADQGTTE | RDFDVSSSSA | ILLRQDAPYW | CPERFLSTAS |
| 170        | 180        | 190        | 200        | 210        |            |            |            |
| FQWEQCTWFI | WLHSLGDHRL | KRLSAQGAPA | STTVEHVLVR | WKKL       |            |            |            |

Spot number 6Wu

related to YPT-1 GTP-binding protein ypt1 [*Piriformospora indica* DSM 11827]

| 10         | 20         | 30         | 40         | 50         | 60         | 70         | 80         |
|------------|------------|------------|------------|------------|------------|------------|------------|
| MAGDARPKVE | ETFEPLHLLA | TLTMHASEYD | YLFKLLIGD  | SGVGKSCLLL | RFADDTYTES | YISTIGVDFK | IRTIELEGKT |
| 90         | 100        | 110        | 120        | 130        | 140        | 150        | 160        |
| VKLQIWDTAG | QERFRTITSS | YYRGAHGIIV | VYDVTDTDTF | TNVKQWLQEI | DRYASEGVNK | LLVGNKSDLT | SKKVVEYTVA |
| 170        | 180        | 190        | 200        | 210        | 220        | 230        |            |
| KEFADQLGIP | FLETSAKNAT | NVEQAFLTMA | KQIKDKMGAS | GTGGPTSKTN | TITPGTGITT | NTSSGCC    |            |

Spot number 8Wu

hypothetical protein PIIN\_10216 [*Piriformospora indica* DSM 11827]

|            |            |            |                    |                   |            |                    |                   |
|------------|------------|------------|--------------------|-------------------|------------|--------------------|-------------------|
| 10         | 20         | 30         | 40                 | 50                | 60         | 70                 | 80                |
| MDIIVTTFSS | LSLGTILLLC | AIPWVPVIKI | AITLSFIVFP         | VMLFLRHLRN        | HPLSEGSTAY | LWSGLWILSY         | TRPTTRIHKY        |
| 90         | 100        | 110        | 120                | 130               | 140        | 150                | 160               |
| LQSNQVVRYS | LSRLPTEIWS | KILTFALDMP | EIMDSICTSE         | IIWEEPPDA         | HQTTNRASIP | IHRRT <b>ESSAR</b> | <b>DTHATKARVE</b> |
| 170        | 180        | 190        | 200                | 210               | 220        | 230                |                   |
| PSLLGVEQHS | AALSDRVVLR | PSGRLPHGQA | ARTDIGR <b>HSY</b> | <b>ATKLRV</b> LNE | LDEGSRPSSL | AYPCHL             |                   |

Spot number 9Wu

predicted protein [*Laccaria bicolor* S238N-H82]

|                    |                   |            |            |            |                   |                   |            |
|--------------------|-------------------|------------|------------|------------|-------------------|-------------------|------------|
| 10                 | 20                | 30         | 40         | 50         | 60                | 70                | 80         |
| MLPHQLLDQ          | LPLVCEQDPC        | ISVEYAWINQ | PSNNPLCQLS | TLKQVTFDLP | FKEWLIITPG        | HAKLLQGIMS        | DVGQATAEDG |
| 90                 | 100               | 110        | 120        | 130        | 140               | 150               | 160        |
| HQWER <b>LMEGE</b> | <b>KEVDIARQOS</b> | LISLAKPVSM | ILLVNNQLTK | ITHLMMAFIF | <b>NFSVSG</b> TLW | <b>KETNQSKSCI</b> | VKVKVAF    |

Spot number 11Wu

hypothetical protein PIIN\_02973 [*Piriformospora indica* DSM 11827]

|                     |            |             |            |            |                     |                   |                   |
|---------------------|------------|-------------|------------|------------|---------------------|-------------------|-------------------|
| 10                  | 20         | 30          | 40         | 50         | 60                  | 70                | 80                |
| MVESAKRRWS          | YRTFVDTAQV | LFGKAQVPQD  | CMLAIQQTVE | LGRWKQNELD | KECLSYRTLA          | RCALHLERLL        | DQLQLALLH         |
| 90                  | 100        | 110         | 120        | 130        | 140                 | 150               | 160               |
| SSVLPAEN <b>NPT</b> | TKVEKSDFLQ | LYTHFNEDDM  | LYQGTLEILM | QSPALTLALG | GHSWSGGESY          | ISLDDVYPPL        | APSSLLISSK        |
| 170                 | 180        | 190         | 200        | 210        | 220                 | 230               | 240               |
| SQSQELESKT          | LPSGESPVAL | PYL TALLFLH | AVVSGFSPNV | PEIMETTQRI | LVLILRAP <b>Q</b> N | <b>ITLLQRLPAT</b> | <b>ALVARLSEDK</b> |
| 250                 | 260        | 270         | 280        |            |                     |                   |                   |
| <b>HAKELFDDLL</b>   | LRLEDPALVQ | TARLLSGLGE  | PAESSHL    |            |                     |                   |                   |

Spot number 17Wu/17Fc

hypothetical protein PIIN\_05768 [*Piriformospora indica* DSM 11827]

|            |                    |                    |            |            |                    |                     |                    |
|------------|--------------------|--------------------|------------|------------|--------------------|---------------------|--------------------|
| 10         | 20                 | 30                 | 40         | 50         | 60                 | 70                  | 80                 |
| MSKSTLVPAR | <b>NAIHGT</b> GRAK | LVFGTTASF          | AELSYTYPLK | LLSPRQTTAT | NIERLAILY <b>N</b> | <b>LSYGG</b> LIGG   | DQLALTLELG         |
| 90         | 100                | 110                | 120        | 130        | 140                | 150                 | 160                |
| SDVKLLFLTQ | GSTKIFPSRA         | RPRLATGRAE         | VGDTRQRLSA | TIGSGACLVM | LPDPVTPFSH         | SSYSQVQIFR          | LAAPT KD TAG       |
| 170        | 180                | 190                | 200        | 210        | 220                | 230                 | 240                |
| GSIVLLDWFT | SGRMSR <b>GEEW</b> | <b>QFDRY</b> RSANE | IWIGNERVAS | DVLLLEQPPS | SSSVDETAKK         | INRLRDSLAP          | YACYATLLLF         |
| 250        | 260                | 270                | 280        | 290        | 300                | 310                 | 320                |
| GPATHALSKE | <b>FAQRYD</b> GLSQ | MQRKVPEDLI         | USYSPLYEKT | SINNGKRNSG | QKETGVGAIV         | RVAAK <b>D</b> TESV | <b>RQWLRE</b> SLRA |
| 330        | 340                |                    |            |            |                    |                     |                    |
| GLEAQIGRNA | YSKAFV             |                    |            |            |                    |                     |                    |



Spot number 18Wu/18Fc

u3 small nucleolar RNA-associated protein 11 [*Coprinopsis cinerea* okayama7#130]

|            |            |            |                    |            |            |                   |            |
|------------|------------|------------|--------------------|------------|------------|-------------------|------------|
| 10         | 20         | 30         | 40                 | 50         | 60         | 70                | 80         |
| MTSSLRNSLH | RRNHKERSQL | AHRTKLGFL  | KHKDYVKRAR         | DYHSKQDRLN | RLKQKAAERN | <b>KDEFYFSMKR</b> | EKTRAGVHIK |
| 90         | 100        | 110        | 120                | 130        | 140        | 150               | 160        |
| DRGNAAIPTD | IVKVLKTQDE | NYVRTMRLSN | LKKIDRLKRQ         | LTEMADLFKS | SLGGEDLEED | EYEVLQEAGI        | LPPSGKKRGR |
| 170        | 180        | 190        | 200                | 210        | 220        | 230               | 240        |
| SKSKHLVFAE | SLEEAQTLGQ | KAKTAAEPDH | SSPPQEPEPT         | PEDLGWKTRD | NKKRRRTRQ  | TIEELEDVDG        | EWEDEDLTT  |
| 250        | 260        | 270        | 280                | 290        | 300        | 310               | 320        |
| HDSGSQSSTE | KRTRLLKEIS | ARLVRDRQLR | YTQ <b>REFEMQR</b> | LLMGKGAACK | IAGVEKFGED | DSEDEDAL          | DARGGRPLKK |
| 330        | 340        | 350        |                    |            |            |                   |            |
| SKVVDEATYK | PRVYKWKLER | KR         |                    |            |            |                   |            |

Spot number 19Wu/19Fc

related to RTM1 protein [*Piriformospora indica* DSM 11827]

|                   |                    |                   |                    |            |             |            |            |
|-------------------|--------------------|-------------------|--------------------|------------|-------------|------------|------------|
| 10                | 20                 | 30                | 40                 | 50         | 60          | 70         | 80         |
| <b>MERSYFPYKA</b> | SKPAAVLFAV         | LYSVSVAAHV        | FQMIKLRAFY         | MSVLIVGLLV | EVLGYVTRKL  | AIDDDPTLWS | FSTSQCILV  |
| 90                | 100                | 110               | 120                | 130        | 140         | 150        | 160        |
| APAFLAASAY        | MIVGR <b>MMAYV</b> | <b>GPGASVISHR</b> | <b>LITKVFVI</b> VD | ILCLITQAAG | IAMFVTNVDK  | ADRTVVLGR  | NILMTGLALQ |
| 170               | 180                | 190               | 200                | 210        | 220         | 230        | 240        |
| IISYLIFVVI        | TIIFDIRAQR         | MKGTQLKKLR        | PLFWASYSVA         | FLIIGRSIYR | AIEFGTVDFK  | RRTQGYLYTH | EWPFYVLDAV |
| 250               | 260                | 270               | 280                | 290        | 300         |            |            |
| PILAAAVILN        | VIHPSSYLP          | KKGLRMDGTI        | EVPARHWSK          | SKSTKEHELE | <b>NATP</b> |            |            |

Spot number 21Wu/21Fc

probable ENO1-enolase I (2-phosphoglycerate dehydratase) [*Piriformospora indica* DSM 11827]

|                    |                   |                   |                   |                    |                    |                   |                   |
|--------------------|-------------------|-------------------|-------------------|--------------------|--------------------|-------------------|-------------------|
| 10                 | 20                | 30                | 40                | 50                 | 60                 | 70                | 80                |
| MSITKVHAR <b>Q</b> | <b>IFDSRGNPTV</b> | <b>EVDLYTAKGR</b> | <b>FRAAVPSGAS</b> | <b>TGVHEAVELR</b>  | DGDKKSYVGK         | <b>GVLNAVKNVN</b> | <b>ETIAPALIDS</b> |
| 90                 | 100               | 110               | 120               | 130                | 140                | 150               | 160               |
| GLSVTQQKDI         | DALLIKLDGT        | PNKGKLGANA        | ILGVSIAVAE        | AGAAESGLPL         | YAYLAKLAGH         | PEGGKMTMPC        | PAFNVIINGGS       |
| 170                | 180               | 190               | 200               | 210                | 220                | 230               | 240               |
| HAGNGLAFQE         | FMLLPTGATS        | FTEAMKIGTE        | TYHTLKKVIQ        | ARYGLDATNV         | GDEGGFAPNV         | AGAEESLELL        | SEAIKKAGYE        |
| 250                | 260               | 270               | 280               | 290                | 300                | 310               | 320               |
| GKIKIGLDVA         | SSEFYKDGKY        | DLDFKNANS         | PTKWITGKEL        | GDFYNKMIK          | YPIVSIEDPF         | DQDDWEAWSS        | <b>FTNGTKVQVV</b> |
| 330                | 340               | 350               | 360               | 370                | 380                | 390               | 400               |
| <b>GDDLTVTNP</b> E | <b>RIQTAIGKKA</b> | CNGLLLKINQ        | <b>IGTISESIQA</b> | <b>AQLAQSDG</b> WG | <b>VNVSHRS</b> GET | ENTVIADLVV        | ALGGCQIKTG        |
| 410                | 420               |                   |                   |                    |                    |                   |                   |
| AP&RSERVAK         |                   |                   |                   |                    |                    |                   |                   |

Spot number 5Wd/5M

G protein alpha-subunit [*Laccaria bicolor* S238N-H82]

| 10         | 20        | 30         | 40         | 50         | 60         | 70      |
|------------|-----------|------------|------------|------------|------------|---------|
| MLEYDQMLYE | DESVDQMEE | LSLFDLVCNS | RWFIKTSIIL | FFNKIDLLTK | KTPPLTTGGL | LPRLCRW |

Spot number 12Wd/12M

predicted protein [*Laccaria bicolor* S238N-H82]

| 10                | 20                 | 30         | 40         | 50         | 60         | 70         | 80                |
|-------------------|--------------------|------------|------------|------------|------------|------------|-------------------|
| MLSFIVLCGC        | IAYAVAQSTT         | ARILIYSATA | GFRHDSIPTA | IEALKQGGNP | INVQFDATED | HSQFTTAILS | QYDALLFLST        |
| TGEVLDDPGK        | AAFRTYLNMG         | GNFIGVHAAS | DCLRNTSSYR | SELGTLFDYH | PPLQNAIVNV | VGPSHPSTRK | <u>LPAANKVQDE</u> |
| <u>MYNFISDPRA</u> | IGATVILSAD         | ESSYVDNGTR | KFDQGTPHPT | AMFQERGAGA | EAGGTRGRSF | YTSLGHLNET | WKDDLFSHI         |
| IGGVSWALQG        | <u>NTTRAFN</u> ASA | LVGNSQQSTT | SRVGAASTAA | GPRESAHTSR | SVVSRPAWLL | LGMGVLQNLF | LCNDI             |

Spot number 13Wd/13Mu

predicted protein [*Laccaria bicolor* S238N-H82]

| 10         | 20         | 30         | 40         | 50         | 60          | 70                | 80         |
|------------|------------|------------|------------|------------|-------------|-------------------|------------|
| NTSSLRNSIH | RRNHKERSQL | AHRAKFCVLE | KHADYVKRAR | DYHSKQDRLT | RFKQKAAEPN  | <u>KDEFYFSMKR</u> | EKTGGGVHVK |
| DRGNVALPSD | IVKVLKTODE | NYVRTMRSAG | LKKIDKIKSQ | LTEMADLLKP | TGAASDDEVE  | EELDDEEYQT        | LLDAGMLSQR |
| PGGRKRPPGH | IIFAESSEEA | KKLGSKRKRT | IEEPSHPKEV | QQDLGWASTA | SKKKS IKEVV | ESSPQDDEDA        | RETQALARES |
| KKRLLTELSA | RLGRDQSLRY | AQREFEHQRL | MMCGGCRKKI | RGVEKVEGEN | DEDEEEDQDE  | IDARKGRRRK        | SSQKVDETTY |
| KPRVYKWKLE | RKR        |            |            |            |             |                   |            |

Spot number 20Wd/20Mu

hypothetical protein PIIN\_01661 [*Piriformospora indica* DSM 11827]

| 10         | 20          | 30         | 40         | 50         | 60         | 70         | 80         |
|------------|-------------|------------|------------|------------|------------|------------|------------|
| MNTPQRRKRV | GSPAEGDMSG  | LSAGIGVELS | MEDKERLIEN | LDIEVTNHRH | RFEAFLEQLL | EGFSLRHGME | ISRIPKAIRN |
| 90         | 100         | 110        | 120        | 130        | 140        | 150        | 160        |
| MKMKDFDAFG | GNVQRCVQAM  | ARQRVAEADG | DANAKRKRKQ | AAIQEEIEER | ASKTPRVAPP | SPVKTSKPSS | QVPNSSRAKG |
| 170        | 180         | 190        | 200        | 210        | 220        | 230        | 240        |
| LFPKTPTRNM | NNVNPYTKTAL | HGSARKVMPS | PSKRAVSPTK | PQNMPTSSTS | SFKPASTTFN | PVLPPKTPTY | PRRVARADEA |
| 250        | 260         | 270        | 280        | 290        | 300        | 310        | 320        |
| VMSLNGTPLK | FPSAFMFPRG  | VAPIVDEGEE | SEHDSHAKST | GVGPAFLVRR | DPSTVSMGSS | SASTAVSSTG | TLITISTSKG |
| 330        | 340         | 350        | 360        | 370        |            |            |            |
| QTVQFDPLMA | SPGSLDRIPD  | LTESAKKQVR | EDTARIVQAL | HKWRL      |            |            |            |

Spot number 22Wd/22Mu

hypothetical protein PIIN\_01521 [*Piriformospora indica* DSM 11827]

| 10          | 20         | 30         | 40         | 50         | 60         | 70         | 80         |
|-------------|------------|------------|------------|------------|------------|------------|------------|
| MASVIPSVTP  | NARSTLQREY | FTSELFVNPA | RSDIEDLLAS | FEEAVEQPLK | PFDIFKTVWS | QEGWKTCLY  | IWEDTARDQY |
| 90          | 100        | 110        | 120        | 130        | 140        | 150        | 160        |
| LQTMLRFLFLE | RVKDSSEFAR | QLGAVFGLYT | FFQQQATIKS | LYSVSSIEIT | IDKLEYLCSL | CKESPVAHQF | YVVFILRYFL |
| 170         | 180        | 190        | 200        | 210        | 220        | 230        | 240        |
| ERDIFHILPH  | SSLQPYNPTN | LPASFVVSRE | SSSGADAQSH | GGNSKKTTRG | GRTKAERDRY | GREQWAQLGS | LVRLQRQRQK |
| 250         | 260        | 270        | 280        | 290        | 300        | 310        | 320        |
| GEVDDVEIAV  | GAQPHSDANK | NTSGSTPFPD | KDSSAVVYRE | AKSRULEVLP | KEVEREAEQR | ALQRLKTLAS | SVESDVHSGL |
| 330         | 340        | 350        | 360        | 370        | 380        | 390        | 400        |
| KKQRLMETDD  | SMMEMESVTA | AOKDNORORE | EGDDEGGMVS | QAHKVSHASD | GVARLENMIK | NGHGVLRNQW | ANE        |

Spot number 23Wd/23M

hypothetical protein PIIN\_03309 [*Piriformospora indica* DSM 11827]

| 10          | 20         | 30         | 40         | 50         | 60         | 70         | 80          |
|-------------|------------|------------|------------|------------|------------|------------|-------------|
| MFYCHPEHQF  | NAANLLWELI | EQDERALQEV | KEEEERLENE | REGILAHLCV | LANDTQVLCQ | LAEVALPNIK | NIIDALKPEI  |
| 90          | 100        | 110        | 120        | 130        | 140        | 150        | 160         |
| SALETKREDG  | HFSNYGGWLE | KYKNYIKVTV | GFMEEQHMK  | TOOLVREYVE | PESMARLKLD | HIDGLLKETA | DRIQATSIRL  |
| 170         | 180        | 190        | 200        | 210        | 220        | 230        | 240         |
| QTKRLKLSKT  | PFSRLTDENW | RLIFGYASIS | FHPHHAGEQV | CDRSISTSIH | ALTRVCHRMY | KVIYQSSKLW | RRVYLNVEGL  |
| 250         | 260        | 270        | 280        | 290        | 300        | 310        | 320         |
| KNDSSRKLLN  | LILSKAAEYV | GHILDALPTP | YELAIRSLLM | TNTRLLYHPR | SLDTLEVVEA | TNVELVLETG | RNLPNLRLLK  |
| 330         | 340        | 350        | 360        | 370        | 380        | 390        | 400         |
| LQANTSIITPC | TEFYDYTSKT | STIDLAGGSF | HLPRRVPRLQ | PMDAHSIRGT | LNSILSVFSP | RVVFTQLSEI | TLRFPPPEPAN |
| 410         | 420        | 430        | 440        | 450        | 460        | 470        | 480         |
| MPDLATWCSF  | LSSSKASTVT | SLTLYPMENA | KILSHYVTAL | HNLARLRVHG | SSVDFLLKEL | TWQVEDERSK | VLTFLSVLEI  |
| 490         | 500        | 510        | 520        | 530        |            |            |             |
| HDDYDGRGSPV | VEFYOSKLAS | SYRTLRTVRF | ANCPNIPOEI | ROIFIDN    |            |            |             |
